# Supplementary material for: A pyrene–N-phenylparaphenylene diamine-based imine conjugate for the detection of trace amounts of water in organic solvents: real-time application in honey samples
Source: Royal Society of Chemistry journal article supplement (doi:10.1039/d2nj03605c), 2022-01-01
Supplement: d2nj03605c1.pdf [file d2nj03605c1.pdf]

## **Supporting Information for New Journal of Chemistry**

# **Pyrene – N-phenylparaphenylene diamine-Based Imine Conjugate as a Chemodosimeter for the Detection of Trace Amounts of Water in Organic Solvents: Real-Time Application in Honey Samples**

Ramakrishnan AbhijnaKrishna, Natarajan Vijay and Sivan Velmathi\*

*Organic and Polymer Synthesis Laboratory, Department of Chemistry, National Institute of Technology,  
Tiruchirappalli, 620015, India*

*Corresponding author: [velmathis@nitt.edu](mailto:velmathis@nitt.edu)*

## Table of Contents

## Page No.

|     |                                                                                                                                                                                                                  |     |
|-----|------------------------------------------------------------------------------------------------------------------------------------------------------------------------------------------------------------------|-----|
| I.  | SUPPLEMENTARY FIGURES                                                                                                                                                                                            |     |
| 1.  | Powder X-ray diffraction (PXRD) study.....                                                                                                                                                                       | S3  |
| 2.  | <sup>1</sup> H NMR spectrum of PNPd in CDCl <sub>3</sub> .....                                                                                                                                                   | S4  |
| 3.  | <sup>13</sup> C NMR spectrum of PNPd in CDCl <sub>3</sub> .....                                                                                                                                                  | S4  |
| 4.  | FT-IR spectrum of PNPd.....                                                                                                                                                                                      | S5  |
| 5.  | Absorption spectra of PNPd (10 μM) in different solvents.....                                                                                                                                                    | S5  |
| 6.  | Absorption spectra of PNPd (10 μM) with varying concentration of H <sub>2</sub> O from 0%, 0.084%, 0.5%, 1%, 1.5%, 2%, 5%, 10%, 15%, 20%, 30%, 40%, to 50% in (a) ACN (b) Dioxane (c) DMSO (d) EtOH (e) THF..... | S6  |
| 7.  | DLS-based particle size analysis of PNPd (10 μM) in (a) 50% H <sub>2</sub> O-DMSO and (b) 90% H <sub>2</sub> O-DMSO.....                                                                                         | S7  |
| 8.  | HRMS spectrum of PNPd in 100% acetonitrile.....                                                                                                                                                                  | S7  |
|     | HRMS spectrum of PNPd in 80% acetonitrile: H <sub>2</sub> O.....                                                                                                                                                 | S8  |
| 9.  | Normalized difference in emission intensity plot to find out the unknown water percentage in (a) ACN (b) Dioxane (c) DMSO (d) EtOH (e) THF.....                                                                  | S9  |
| 10. | Emission intensity plot for the calculation of quantitative determination of water content.....                                                                                                                  | S9  |
| 11. | Comparison of previous reports of water sensors with PNPd.....                                                                                                                                                   | S10 |

## SUPPLEMENTARY FIGURES

### 1. POWDER X-RAY DIFFRACTION (PXRD) STUDY

Crystallite size of PNPd was evaluated and was found to be 142.8 nm. The high intensity peak at  $20.462^\circ$  ( $2\theta$ ) shows a uniform orientation of crystals at that angle. The uniformity in crystal orientation was then found to be in the following angle of orientations ( $2\theta$ ),  $24.288^\circ$ ,  $21.264^\circ$  and  $27.567^\circ$ . At lower angles, there is not much high intensity peaks evidencing lack of uniform orientation however moderate peaks are observed at  $10.18^\circ$  and  $14.58^\circ$  (Fig. S1).

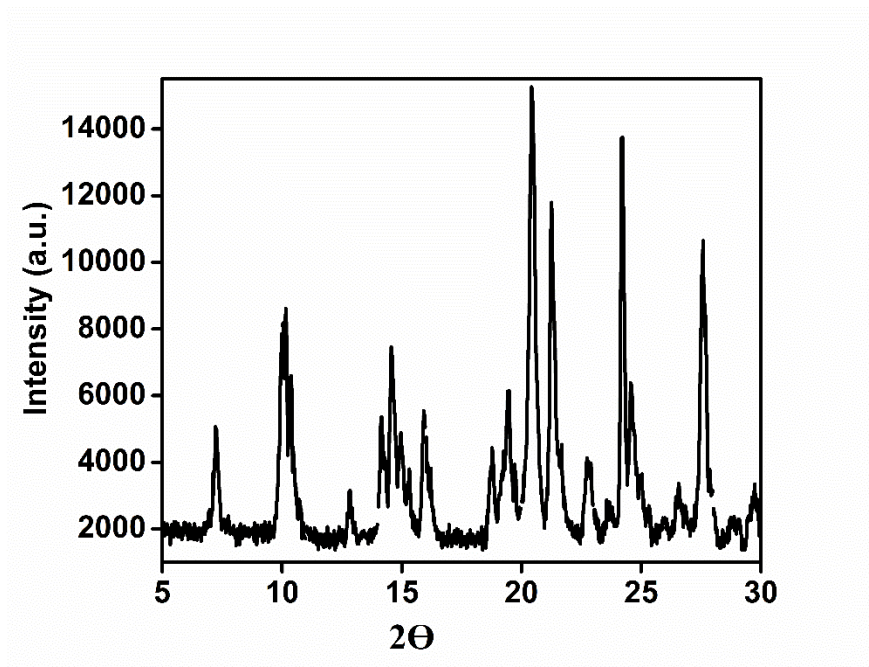

Figure S1. PXRD pattern of PNPd

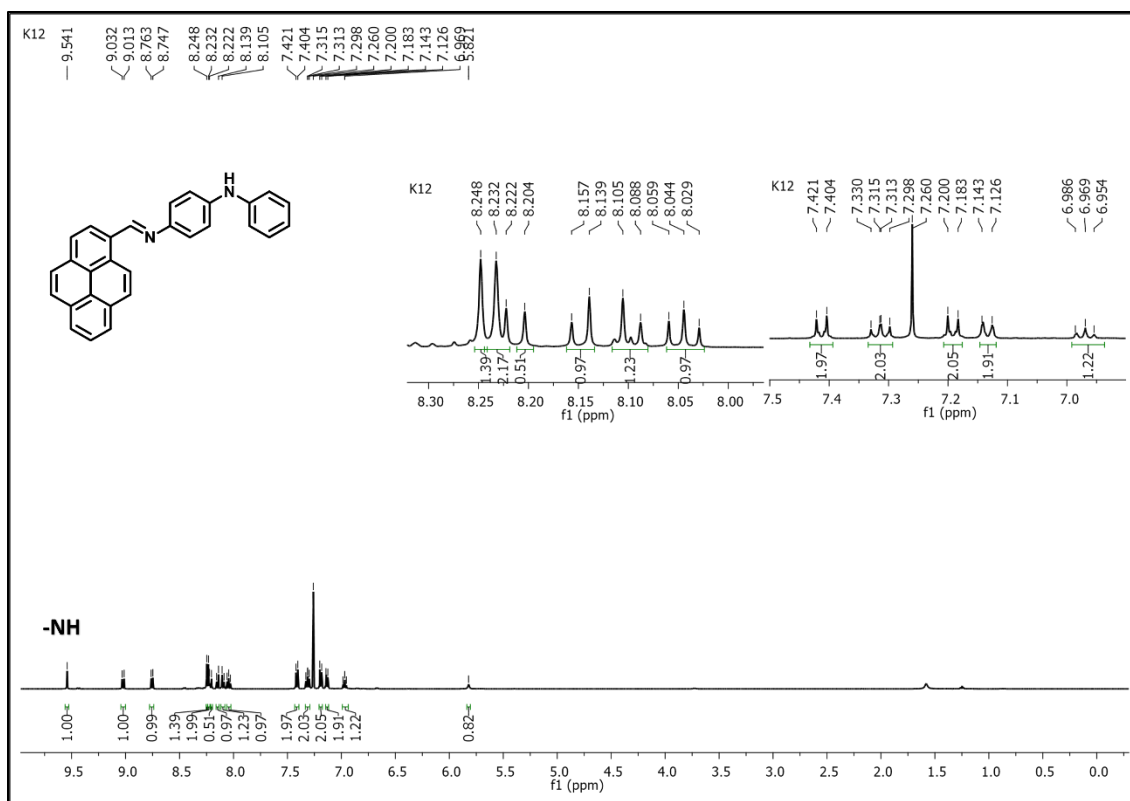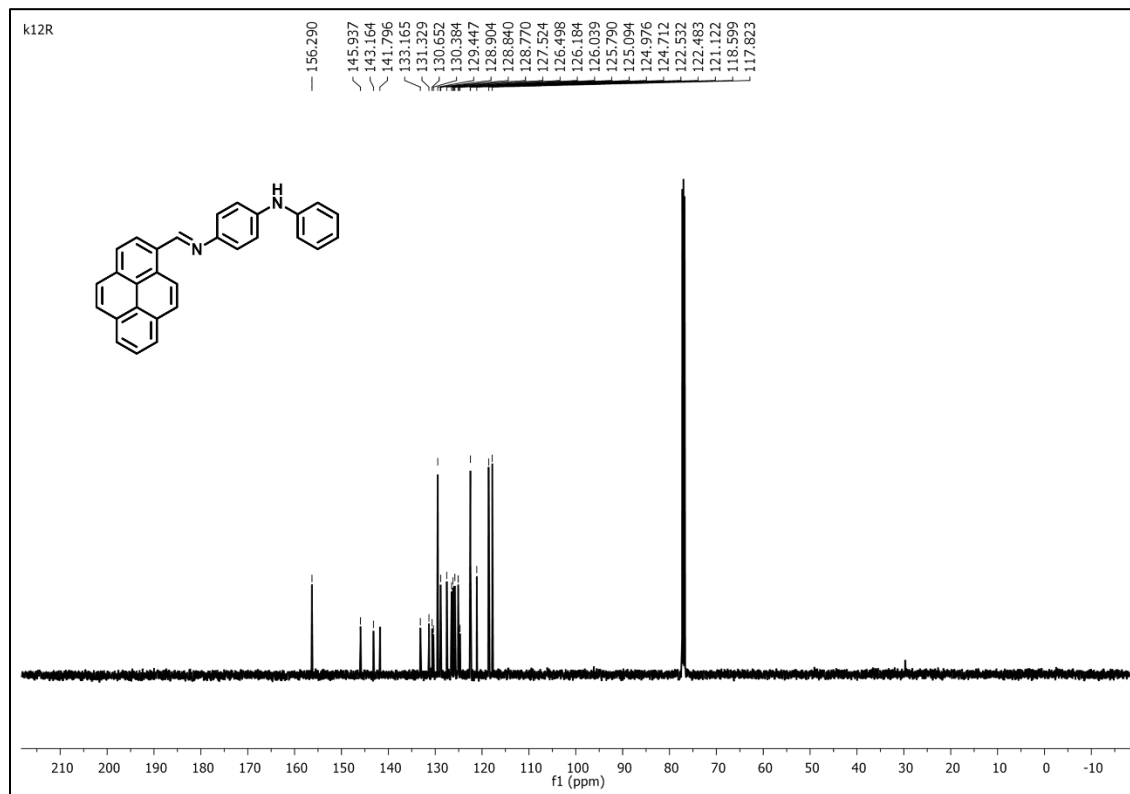

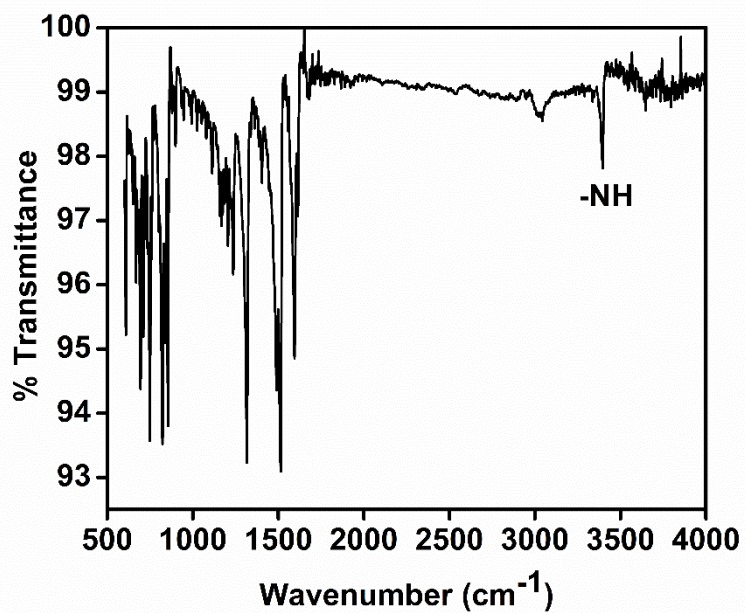

Figure S4. FT-IR spectrum of PNPD

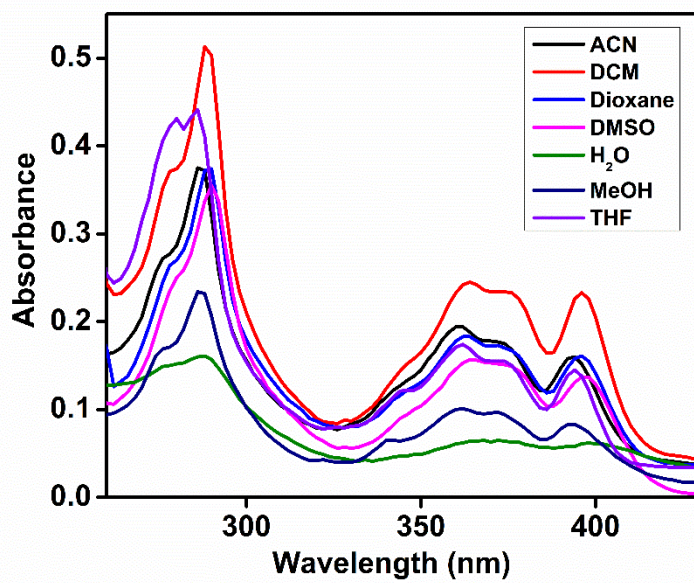

Figure S5. Absorption spectra of PNPD (10μM) in different solvents

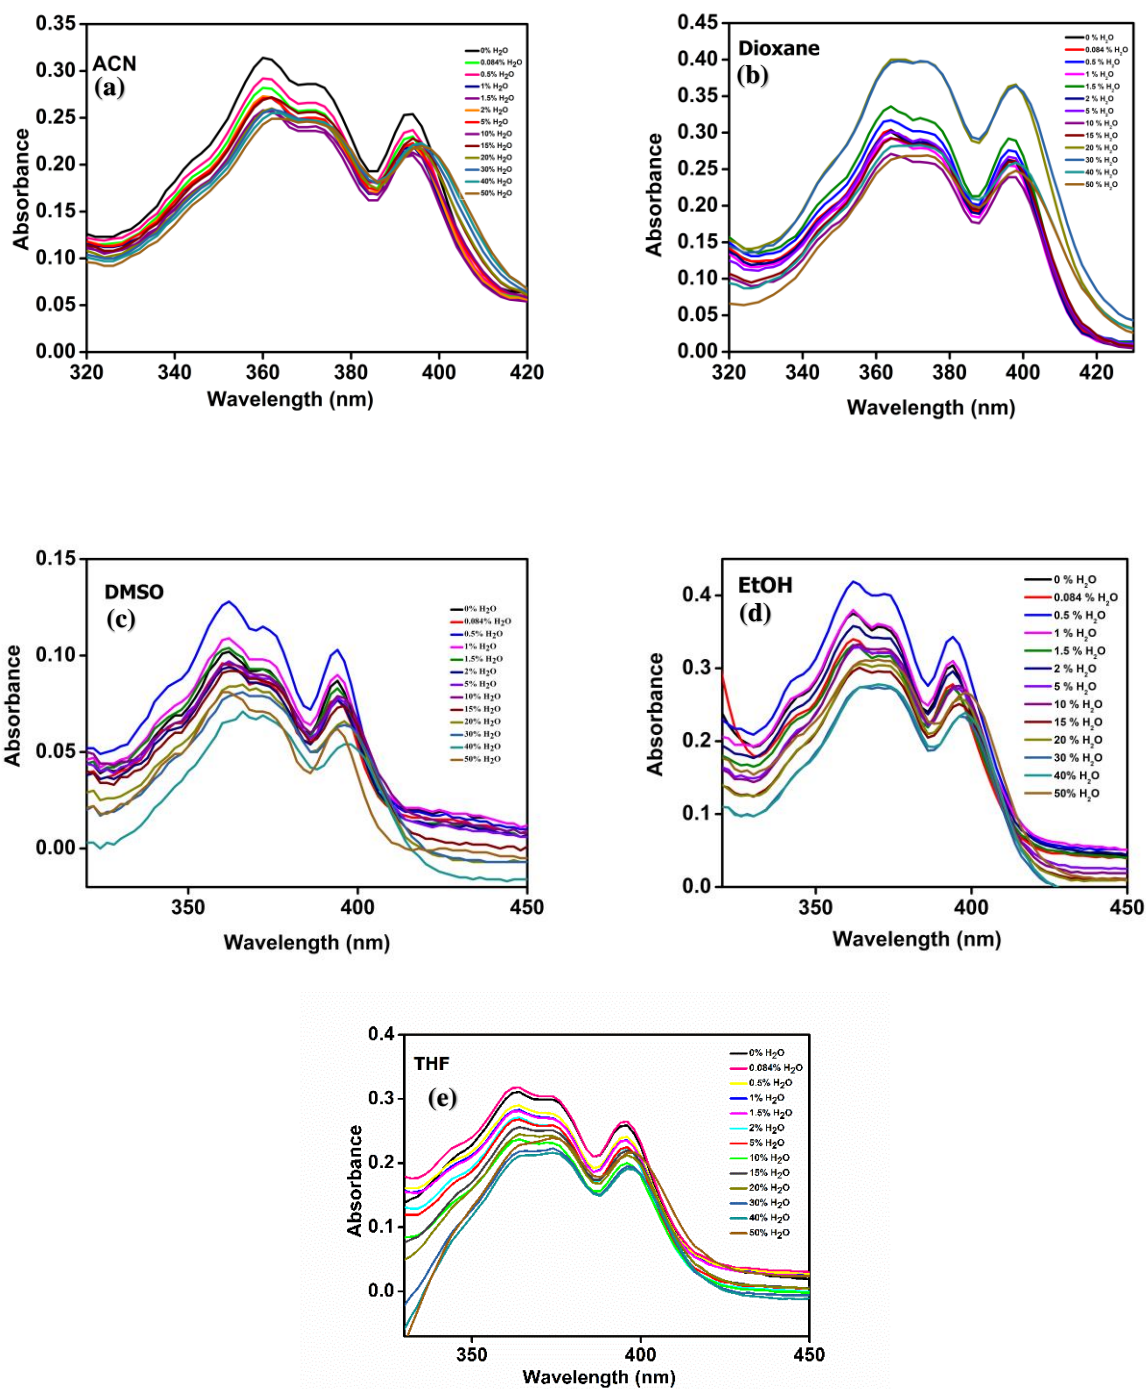

Figure S6. Absorption spectra of PNPd (10 μM) with varying concentration of H<sub>2</sub>O from 0%, 0.084%, 0.5%, 1%, 1.5%, 2%, 5%, 10%, 15%, 20%, 30%, 40%, to 50% in (a) ACN (b) Dioxane (c) DMSO (d) EtOH (e) THF

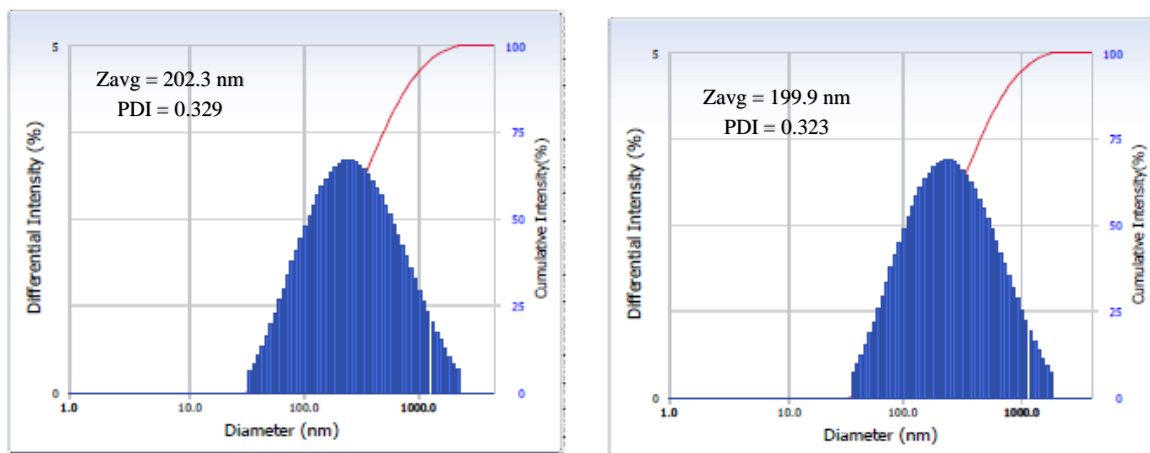

Figure S7. DLS-based particle size analysis of PNPd (10 μM) in (a) 50% H<sub>2</sub>O-DMSO and (b) 90% H<sub>2</sub>O-DMSO

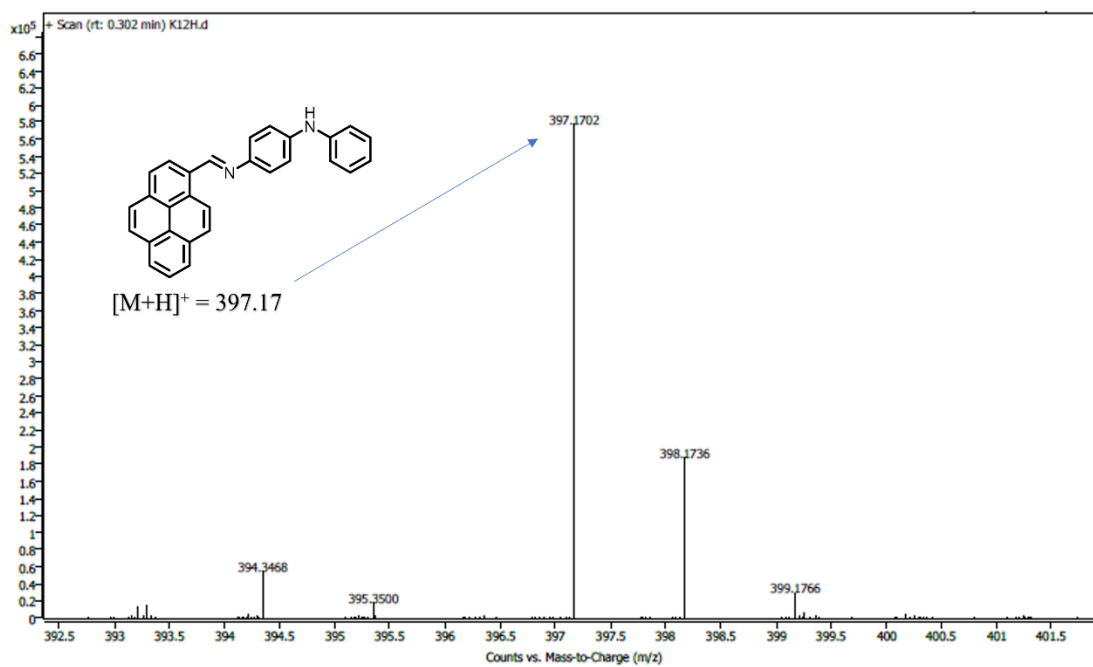

Figure S8. HRMS spectrum of PNPd in 100% acetonitrile

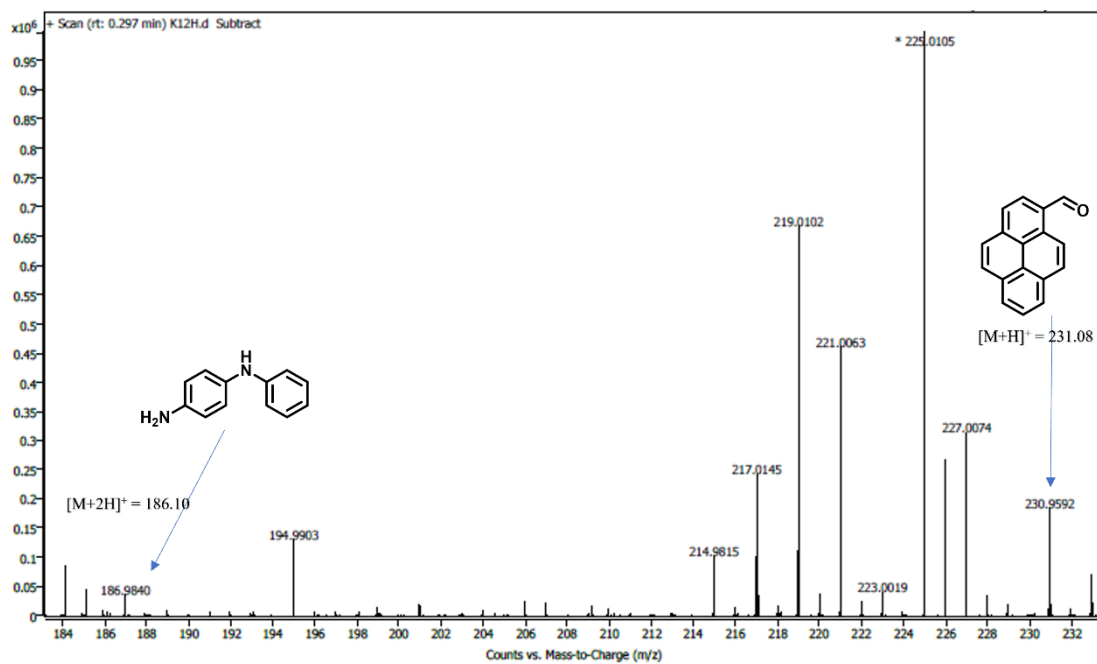

Figure S9. HRMS spectrum of PNPD in 80% acetonitrile: H<sub>2</sub>O

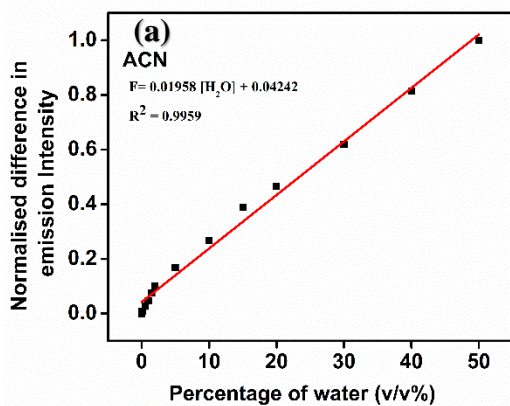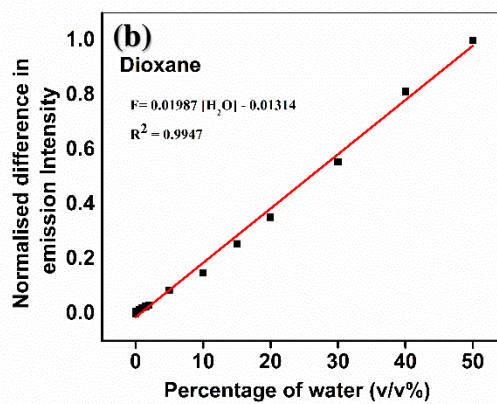



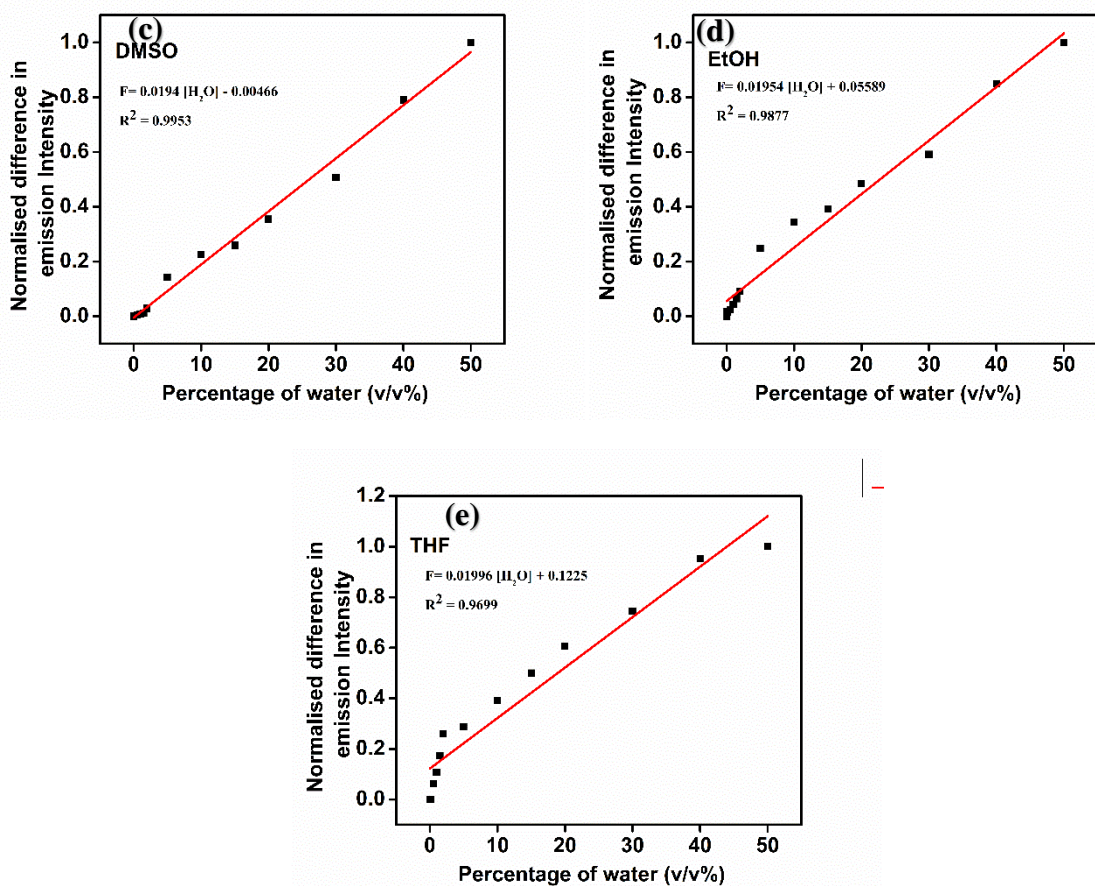

Figure S10. Normalized difference in emission intensity plot to find out the unknown water percentage in (a) ACN (b) Dioxane (c) DMSO (d) EtOH (e) THF

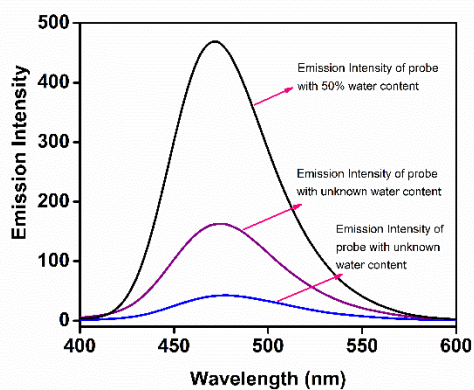

Figure S11. Emission intensity plot for the calculation of quantitative determination of water content.

**Table S1: Comparison of previous reports of water sensors with PNPD**

| Sl. No.             | Sensor molecule                                                                     | Solvent                        | Sensing mechanism                                        | LOD<br>v/v%                      | LOQ<br>v/v%                      | Reference |
|---------------------|-------------------------------------------------------------------------------------|--------------------------------|----------------------------------------------------------|----------------------------------|----------------------------------|-----------|
| 1                   | 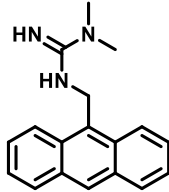   | Dioxane<br>DMF<br>MeCN<br>EtOH | PET                                                      | 0.060<br>0.020<br>0.013<br>0.134 | 0.184<br>0.060<br>0.045<br>0.406 | 1         |
| 2                   |    | DMSO                           | Hydrolysis of imine bond                                 | 0.0018                           | 0.540                            | 2         |
| 3                   |    | MeOH<br>EtOH                   | Protonation induced destabilization of excimer formation | 1<br>2                           |                                  | 3         |
| 4                   |   | Acetone                        | Monomer/excimer switching, ICT FRET                      | 0.0165                           |                                  | 4         |
| 5                   |  | MeCN<br>MeOH<br>EtOH           | ICT                                                      | 0.78<br>0.26<br>0.024            |                                  | 5         |
| 6                   |  | THF                            | H-bonding network                                        | 0.019                            |                                  | 6         |
| <b>Present work</b> |  | ACN                            | Hydrolysis of imine bond                                 | 0.06246                          | 0.20823                          |           |
|                     |                                                                                     | Dioxane                        |                                                          | 0.18329                          | 0.61097                          |           |
|                     |                                                                                     | DMSO                           |                                                          | 0.17478                          | 0.58262                          |           |
|                     |                                                                                     | EtOH                           |                                                          | 0.39660                          | 1.32201                          |           |
|                     |                                                                                     | THF                            |                                                          | 0.47389                          | 1.57965                          |           |

## References

- 1 Y. Ooyama, R. Nomura, T. Enoki, R. Sagisaka, N. Tsunoji and J. Ohshita, *ChemistrySelect*, 2017, **2**, 7765–7770.
- 2 W. Cheng, Y. Xie, Z. Yang, Y. Sun, M.-Z. Zhang, Y. Ding and W. Zhang, *Anal. Chem.*, 2019, **91**, 5817–5823.
- 3 S. A. Yoon, J. H. Oh, S. K. Kim and M. H. Lee, *Dye. Pigment.*, 2019, **165**, 421–428.
- 4 J. Wang, X. Zhang and H.-B. Liu, *Dye. Pigment.*, 2020, **182**, 108685.
- 5 S. D. Padghan, C.-Y. Wang, W.-C. Liu, S.-S. Sun, K.-M. Liu and K.-Y. Chen, *Dye. Pigment.*, 2020, **183**, 108724.
- 6 Y. Liu, Z. Liang, Z. Li, K. Zhao, Y. Sun, X. Zhang, R. Yang and L. Qu, *Microchem. J.*, 2020, **154**, 104640.
